# Supplementary material for: Biomaterials-based immunomodulation enhances survival of murine vascularized composite allografts
Source: Royal Society of Chemistry journal article supplement (doi:10.1039/d2bm01845d), 2023-01-01
Supplement: d2bm01845d1.pdf [file d2bm01845d1.pdf]

### Supplementary Figures and Tables

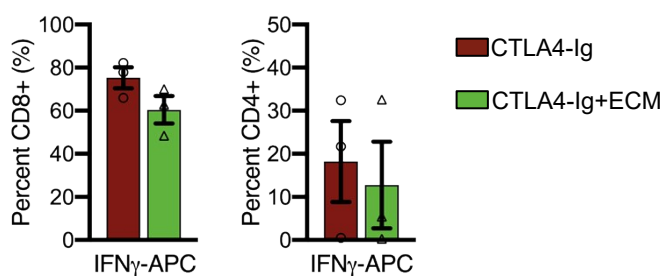

**Supplemental Figure 1:** Intracellular cytokine staining of ECM and CTLA4-Ig costimulatory blockade shows similar IFN $\gamma$  expression for both conditions in both the CD8 and CD4 T cells.

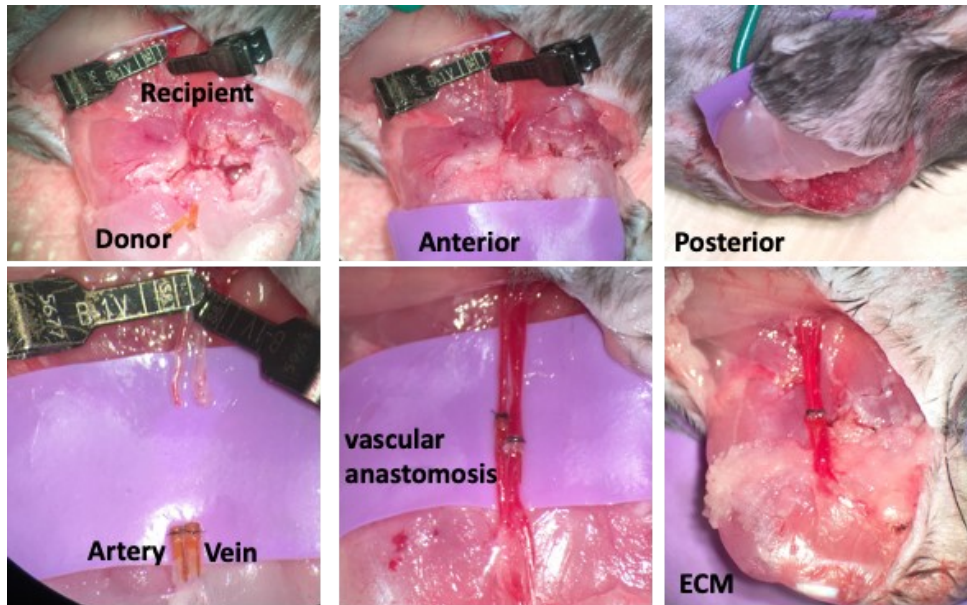

**Supplementary Figure 2:** Overview of transplant protocol and ECM administration at the local wound site. BALB/c (donor) hind limb was orthotopically transplanted to C57BL/6 (recipient) using a “Cuff” technique described by Furtmüller et al. (12). 30 mg of biologic scaffold material composed of decellularized urinary bladder matrix (Matristem, Acell) was resuspending in phosphate-buffered saline (PBS) at 400 mg/ml then injected into the interface and the subcutaneous space surrounding the approximation site of the donor and recipient musculature followed by skin closure.

Supplemental Table 1: Flow Cytometry Antibodies

| <b>Marker</b> | <b>Conjugate</b> | <b>Clone</b> | <b>Manufacturer</b> | <b>Catalog #</b> |
|---------------|------------------|--------------|---------------------|------------------|
| Viability     | eFluor780        |              | ThermoFisher        | 65-0865-14       |
| CD45          | BV605            | 30-F11       | BioLegend           | 103139           |
| F4/80         | PE/Cy7           | BM8          | BioLegend           | 100747           |
| SiglecF       | BV711            | E50-2440     | BD Bioscience       | 740764           |
| CD4           | APC              | GK1.5        | BioLegend           | 100412           |
| CD8           | PE               | 53-6.7       | BioLegend           | 100708           |
| Ly6C          | BV510            | HK1.4        | BioLegend           | 128033           |
| CD11b         | AF700            | M1/70        | BioLegend           | 101222           |
| MHC II        | PE/Dazzle 594    | M5/114       | BioLegend           | 107648           |
| Ly6G          | PacBlue          | 1A8          | BioLegend           | 127611           |
| CD64          | PerCP-Cy5.5      | X54-5/7.1    | BioLegend           | 139308           |
| SiglecF       | BV421            | E50-2440     | BD Bioscience       | 562681           |
| MHC II        | AF488            | M5/114       | BioLegend           | 107615           |
| CD206         | PE               | C068C2       | BioLegend           | 141705           |
| CD86          | APC              | GL-1         | BioLegend           | 105012           |
| IL4           | PE               | 11B11        | BioLegend           | 504103           |
| IFN $\gamma$  | APC              | XMG1.2       | BioLegend           | 505810           |
| CD16/32       |                  | 93           | BioLegend           | 101320           |
| CD8           | BV711            | 53-6.7       | BioLegend           | 100748           |
| CD4           | PE/Cy7           | GK1.5        | BioLegend           | 100422           |
| CD3           | AF488            | 17A2         | BioLegend           | 100212           |

---

Supplemental Table 2: TaqMan Assay Probes

---

| <b>Probe</b> | <b>Assay ID</b> |
|--------------|-----------------|
| IL1 $\alpha$ | Mm00439620_m1   |
| IL1 $\beta$  | Mm00434228_m1   |
| IL4          | Mm00445259_m1   |
| IL6          | Mm00446190_m1   |
| IL13         | Mm00434204_m1   |
| CCL11        | Mm00441238_m1   |
| CCL24        | Mm00444701_m1   |
| Arg1         | Mm00475988_m1   |
| Chil3/Ym1    | Mm00657889_mH   |
| IFN $\gamma$ | Mm01168134_m1   |
| TNF $\alpha$ | Mm00443258_m1   |
| $\beta$ 2M   | Mm00437762_m1   |
| Rer1         | Mm00471276_m1   |

---
